# Supplementary material for: Effects of ionic radius of redox-inactive bio-related metal ions on the radical-scavenging activity of flavonoids evaluated using photometric titration
Source: Royal Society of Chemistry journal article supplement (doi:10.1039/c3cc45124k), 2013-01-01
Supplement: c3cc45124k.pdf [file c3cc45124k.pdf]

## Electronic Supplementary Information (ESI)

### Effects of ionic radius of redox-inactive bio-related metal ions on the radical-scavenging activity of flavonoids evaluated using photometric titration

**Tsukasa Waki,<sup>a,b</sup> Shigeki Kobayashi,<sup>c</sup> Ken-ichiro Matsumoto,<sup>a</sup> Toshihiko Ozawa,<sup>d</sup> Tadashi Kamada\*<sup>a,b</sup> and Ikuo Nakanishi\*<sup>a</sup>**

<sup>a</sup> *Research Center for Charged Particle Therapy, National Institute of Radiological Sciences (NIRS), Inage-ku, Chiba 263-8555, Japan. Fax: +81-43-255-6819; Tel: +81-43-206-3131; E-mail: nakanis@nirs.go.jp*

<sup>b</sup> *Graduate School of Medical and Pharmaceutical Sciences, Chiba University, Chiba 260-8670, Japan.*

<sup>c</sup> *Division of Analytical Chemistry of Medicines, Showa Pharmaceutical University, Machida, Tokyo 194-8543, Japan.*

<sup>d</sup> *Department of Health Pharmacy, Yokohama College of Pharmacy, Yokohama, Kanagawa 245-0066, Japan.*

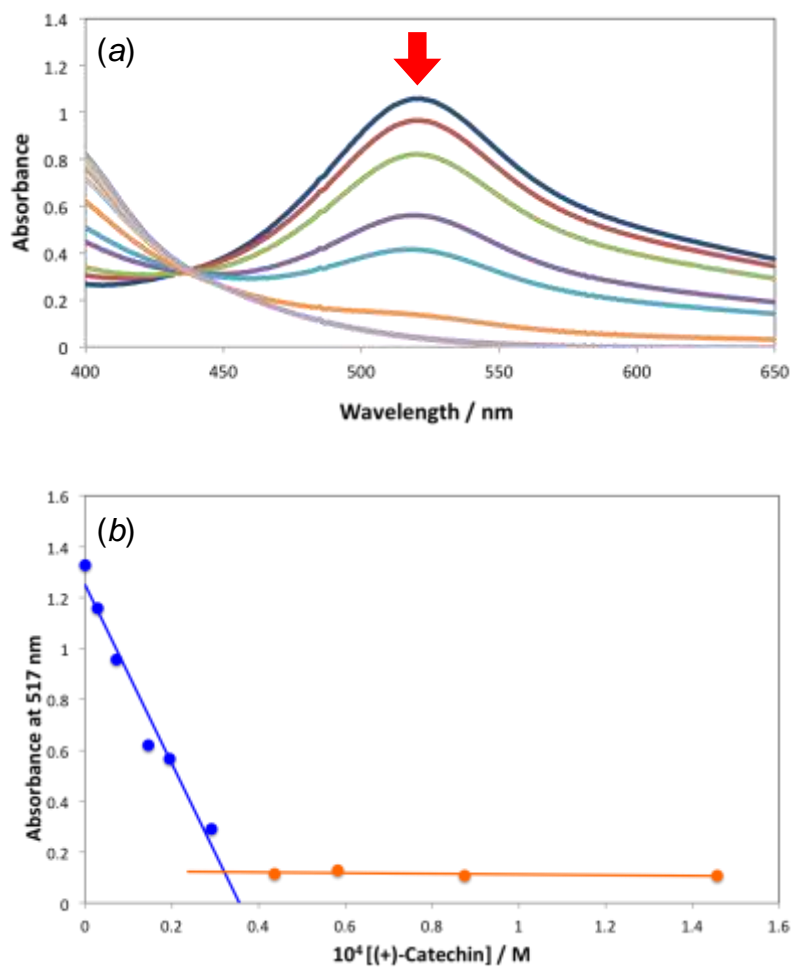

**Fig. S1** (a) UV-vis spectra measured after the reactions of (+)-catechin ( $0$ ,  $2.92 \times 10^{-6}$ ,  $7.29 \times 10^{-6}$ ,  $1.46 \times 10^{-5}$ ,  $1.95 \times 10^{-5}$ ,  $2.91 \times 10^{-5}$ ,  $4.38 \times 10^{-5}$ ,  $5.83 \times 10^{-5}$ ,  $8.75 \times 10^{-5}$  and  $1.46 \times 10^{-4}$  M) with DPPH• ( $1.30 \times 10^{-4}$  M) for 30 min in ethanol/H<sub>2</sub>O (9:1 v/v) at 37 °C. (b) Plot of absorbance at 517 nm vs. [(+)-catechin].

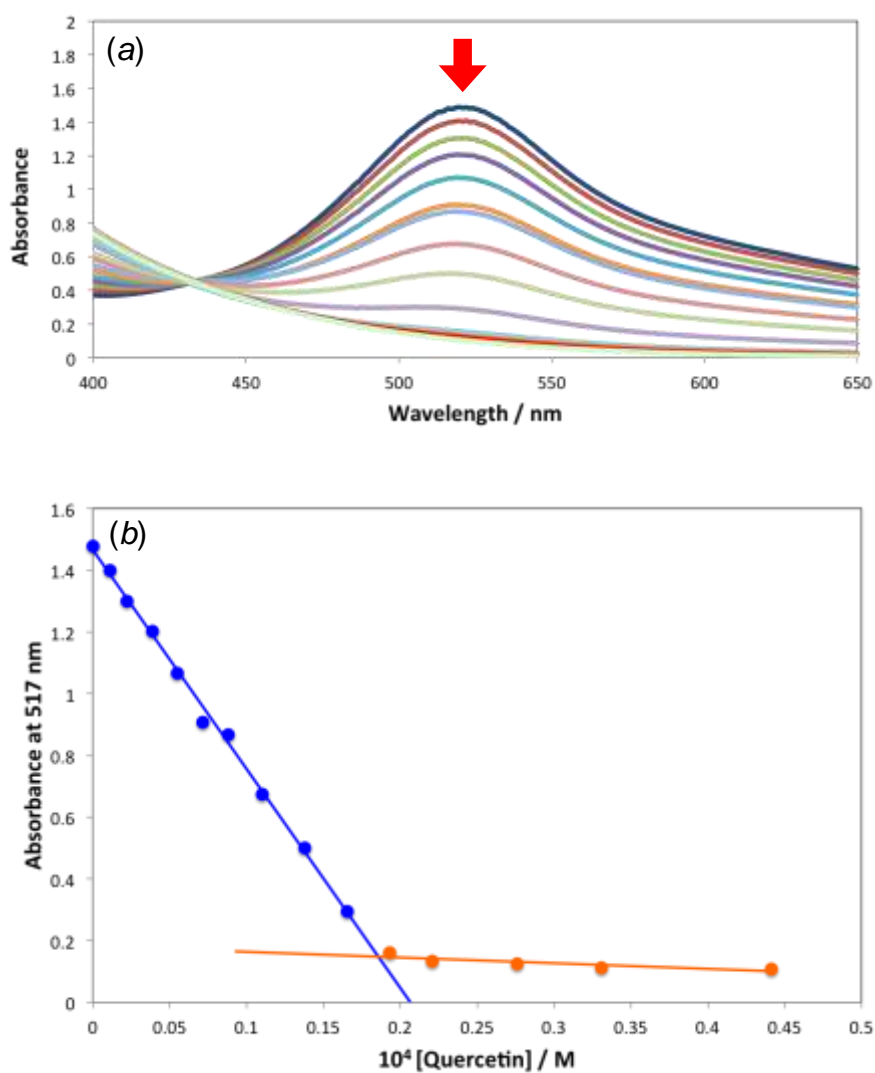

**Fig. S2** (a) UV-vis spectra measured after the reactions of quercetin (0,  $1.10 \times 10^{-6}$ ,  $2.21 \times 10^{-6}$ ,  $3.86 \times 10^{-6}$ ,  $5.52 \times 10^{-6}$ ,  $7.17 \times 10^{-6}$ ,  $8.83 \times 10^{-6}$ ,  $1.10 \times 10^{-5}$ ,  $1.38 \times 10^{-5}$ ,  $1.66 \times 10^{-5}$ ,  $1.93 \times 10^{-5}$ ,  $2.21 \times 10^{-5}$ ,  $2.76 \times 10^{-5}$ ,  $3.31 \times 10^{-4}$  and  $4.41 \times 10^{-5}$  M) with DPPH $\cdot$  ( $1.49 \times 10^{-4}$  M) for 30 min in ethanol/H $_2$ O (9:1 v/v) at 37 °C. (b) Plot of absorbance at 517 nm vs. [quercetin].
